# Supplementary material for: Amorphous and crystalline blends from polytyrosine and pyridine-functionalized anthracene: hydrogen-bond interactions, conformations, intramolecular charge transfer and aggregation-induced emission
Source: Royal Society of Chemistry journal article supplement (doi:10.1039/c4py00706a), 2014-01-01
Supplement: c4py00706a1.pdf [file c4py00706a1.pdf]

Electronic Supplementary Information (ESI) for

**Amorphous and crystalline blends from polytyrosine and  
pyridine-functionalized anthracene: hydrogen bond,  
conformation, intramolecular charge transfer and aggregation-  
induced emission**

Ke-Ying Shih, Yung-Chih Lin, Tai-Shen Hsiao, Shiang-Lin Deng, Shiao-Wei Kuo, and  
Jin-Long Hong\*

*Department of Materials and Optoelectric Science, National Sun Yat-Sen University,  
Kaohsiung, Taiwan 80424, R. O. C. E-mail: jlhong@mail.nsysu.edu.tw; Fax:*

*+886 07 5254099; Tel: +886 07 5252000 ext 4065*

Syntheses of AnPy and PTyr were performed according to the reaction pathways illustrated in Scheme S1. Detailed preparation procedures of PTyr were given previously.<sup>1,2</sup>

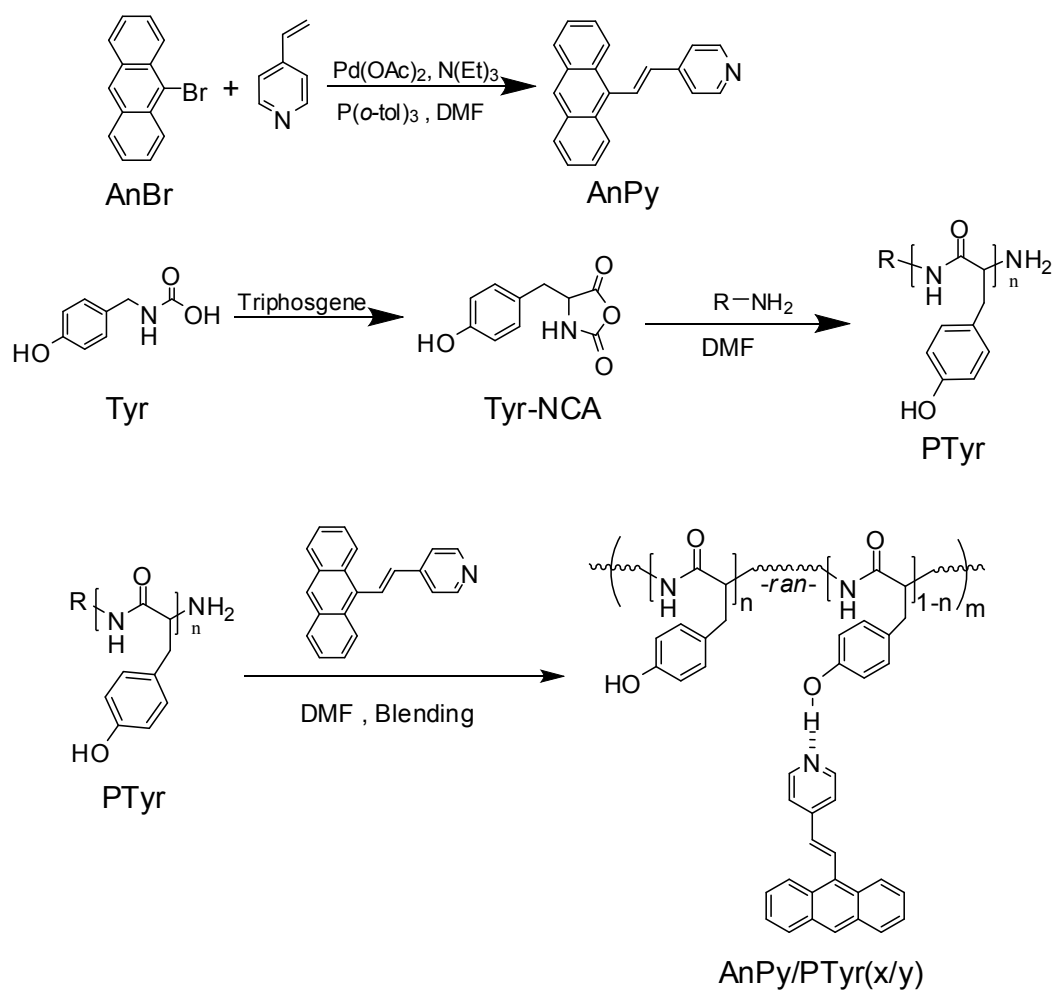

**Scheme S1** Synthesis of AnPy and PTyr.

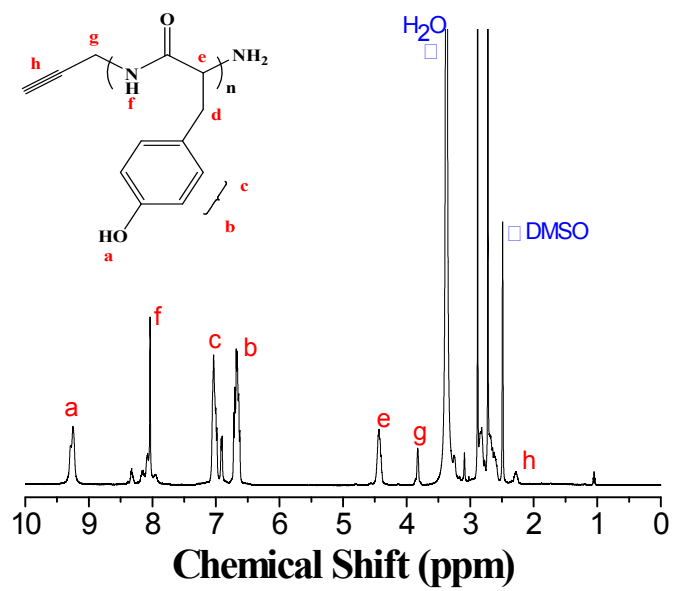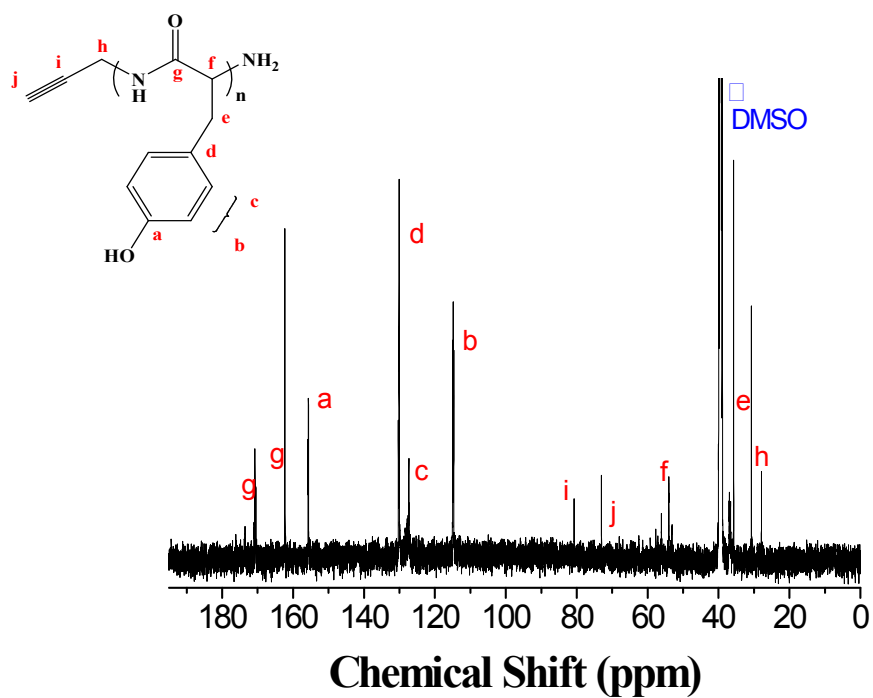

Fig. S1  $^1\text{H}$  and  $^{13}\text{C}$  NMR spectra of PTyr

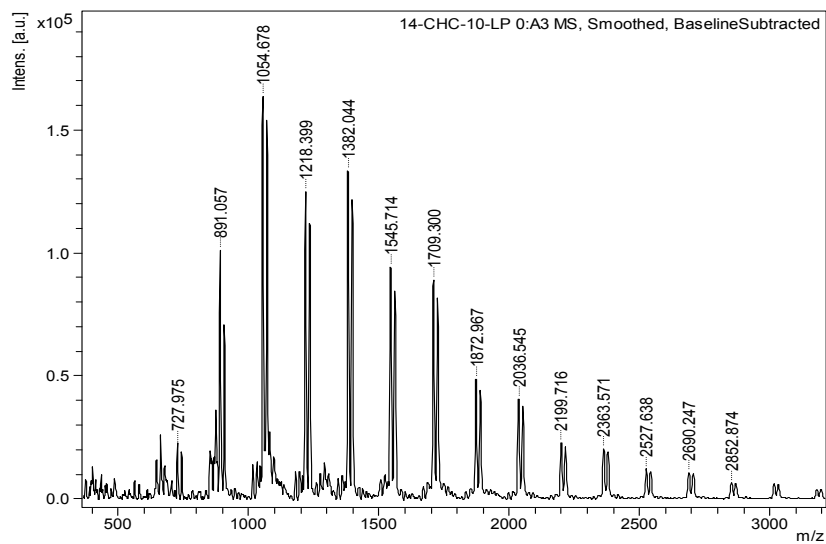

**Fig. S2** MALDI-TOF mass spectra of PTyr

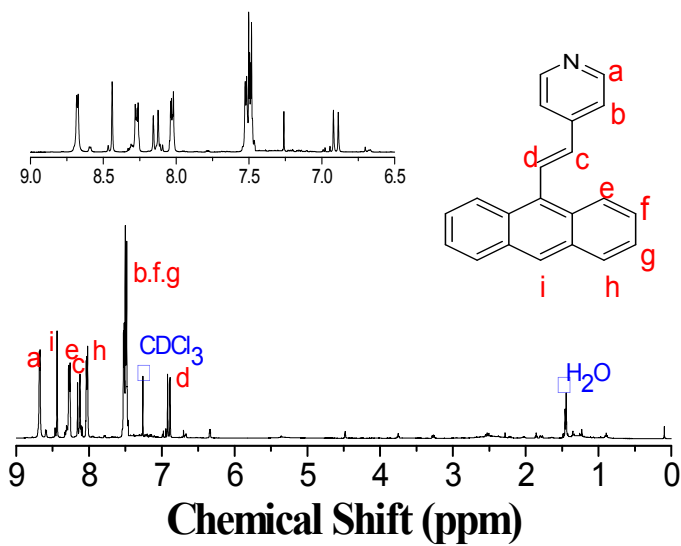

**Fig. S3** <sup>1</sup>H NMR spectrum of AnPy (CDCl<sub>3</sub>)

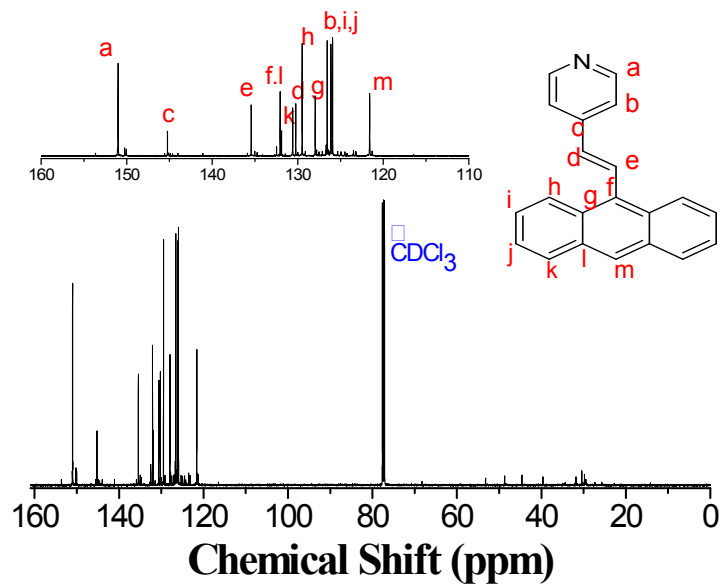

**Fig. S4**  $^{13}\text{C}$  NMR spectrum of AnPy.

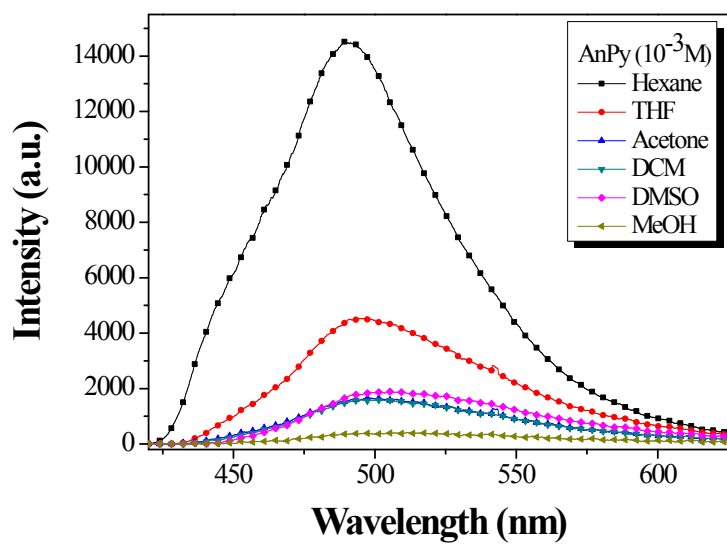

**Fig. S5** AnPy ( $10^{-3}\text{M}$ ) in solvents of increasing polarity. (excited at 400 nm)

## References

1. Y. S. Lu, Y. C. Lin and S. W. Kuo, *Macromolecules* 2012, **45**, 6547.
2. R. K. Scheule, F. Cardinaux, G. T. Taylor and H. A. Scheraga, *Macromolecules* 1976, **9**, 23.
